# Supplementary material for: Histone H4 H75E mutation attenuates global genomic and Rad26-independent transcription-coupled nucleotide excision repair
Source: PubMed Central journal article supplement — Nucleic Acids Res. 2019 May 22;47(14):7392–401. doi: 10.1093/nar/gkz453 (PMC6698655; doi:10.1093/nar/gkz453), 2019-05-22
Supplement: gkz453_supplemental_files.pdf [file gkz453_supplemental_files.pdf]

Supplementary materials for Selvam et al. entitled “Histone H4 H75E mutation attenuates global genomic and Rad26-independent nucleotide excision repair”

**Supplementary Table S1.** UV sensitivity (%) of histone H4 mutants suggested by random mutation screening.

|                                |   | Histone H4 residues |     |     |     |     |     |     |     |     |     |     |     |     |     |     |     |     |
|--------------------------------|---|---------------------|-----|-----|-----|-----|-----|-----|-----|-----|-----|-----|-----|-----|-----|-----|-----|-----|
|                                |   | S64                 | V65 | I66 | R67 | D68 | S69 | V70 | T71 | Y72 | T73 | E74 | H75 | A76 | K77 | R78 | K79 | T80 |
| Histone H4 residues mutated to | A | 86                  | 79  | x   | 324 | 76  | 266 | 117 | 83  | x   | 83  | 79  | 29  | 100 | 227 | x   | 156 | 41  |
|                                | C | x                   | x   | 173 | 48  | 100 | 195 | x   | 119 | 56  | 89  | 43  | 71  | 141 | 127 | x   | 223 | 84  |
|                                | D | 59                  | x   | x   | 396 | 100 | x   | 404 | 177 | 69  | 8   | 88  | 47  | 47  | 179 | x   | x   | x   |
|                                | E | x                   | x   | x   | 88  | 115 | x   | 276 | x   | x   | 62  | 100 | 0   | x   | 102 | x   | 134 | x   |
|                                | F | 317                 | 60  | x   | —   | 34  | 116 | 61  | 68  | 117 | 21  | 29  | 30  | x   | 139 | x   | 150 | 4   |
|                                | G | 432                 | x   | x   | 267 | 50  | 254 | 122 | 114 | x   | 59  | 74  | x   | 127 | 98  | 58  | 156 | 84  |
|                                | H | 186                 | x   | x   | 206 | 145 | x   | 136 | 181 | 131 | 65  | 99  | 100 | x   | 212 | 138 | 187 | x   |
|                                | I | 409                 | x   | 100 | 125 | 26  | x   | 163 | 510 | 425 | 133 | 140 | x   | x   | 169 | 13  | 112 | 32  |
|                                | K | x                   | x   | x   | 199 | 80  | x   | 76  | 66  | x   | 50  | 60  | x   | x   | 100 | 158 | 100 | x   |
|                                | L | 13                  | 171 | x   | 217 | 76  | x   | 44  | x   | 276 | 193 | 76  | 38  | x   | 159 | x   | 160 | 26  |
|                                | M | x                   | 582 | 340 | 28  | 68  | x   | 558 | 121 | x   | 143 | 17  | x   | 12  | 121 | 27  | 124 | 66  |
|                                | N | 232                 | x   | x   | 210 | 109 | x   | 81  | 100 | 20  | 86  | 93  | 63  | x   | 142 | 49  | 98  | 45  |
|                                | P | x                   | x   | x   | 822 | x   | 33  | x   | x   | x   | x   | x   | x   | 29  | x   | x   | 36  | x   |
|                                | Q | x                   | x   | x   | 148 | 108 | x   | 110 | 121 | x   | 80  | 53  | 33  | x   | 66  | x   | 197 | x   |
|                                | R | 422                 | x   | x   | 100 | x   | x   | 85  | 56  | x   | 100 | x   | 52  | 41  | 126 | 100 | 129 | 101 |
|                                | S | 100                 | 221 | x   | 340 | 90  | 100 | 147 | 127 | x   | 113 | 87  | 40  | 104 | 116 | 10  | 102 | 57  |
|                                | T | 247                 | 974 | x   | 168 | 109 | 218 | 109 | 100 | 8   | 100 | 68  | 36  | 19  | 178 | 82  | 54  | 100 |
|                                | V | 23                  | 100 | x   | 317 | 85  | 121 | 100 | 85  | x   | 326 | 110 | 45  | 90  | 100 | x   | 141 | 74  |
|                                | W | x                   | x   | x   | 38  | x   | x   | 80  | 76  | x   | x   | 47  | x   | x   | 180 | x   | 156 | x   |
|                                | Y | 64                  | 0   | x   | 222 | 576 | x   | 136 | 94  | 100 | 31  | 100 | 89  | 55  | 181 | x   | 116 | 44  |

Mutations appeared to be 3 times less or more resistant to UV than wild types are shown in red and green, respectively. x: inviable mutations, which were present in the original plasmids but absent in the 5-FOA-selected yeast cells. —: not calculated for UV survival, as fewer than 10 sequencing reads for this H4 R67F mutation were obtained from both the original plasmid library and plasmids isolated from UV irradiated or unirradiated yeast cells.

**Supplementary Table S2.** Summary for confirmation of UV sensitivity (S) or resistance (R) of histone H4 mutants (fold change relative to wild type cells)<sup>a</sup>.

| Mutation          | Fold change | Mutation | Fold change |
|-------------------|-------------|----------|-------------|
| S64G              | 3 (R)       | T73D     | 10 (S)      |
| S64I              | 3 (R)       | T73F     | 10 (S)      |
| V65T              | 10 (R)      | T73Y     | 30 (S)      |
| V65Y <sup>b</sup> | 3 (R)       | E74M     | 10 (S)      |
| R67A              | 10 (R)      | H75E     | 10 (S)      |
| R67D              | 10 (R)      | A76P     | 5 (S)       |
| R67S              | 5 (R)       | A76T     | 5 (S)       |
| R67V              | 5 (R)       | R78I     | 50 (S)      |
| D68I              | 5 (S)       | R78S     | 10 (S)      |
| D68Y <sup>c</sup> | 3 (S)       | T80F     | 10 (S)      |
| T71I              | 2 (R)       | T80I     | 5 (S)       |
| Y72T              | 5 (S)       | T80L     | 5 (S)       |

<sup>a</sup> The fold changes shown are at 120 J/m<sup>2</sup> of UV and the averages of at least 3 independent experiments. <sup>b</sup> The screening (Supplementary Table S1) indicated that this mutation was UV sensitive. <sup>c</sup> The screening (Supplementary Table S1) indicated that this mutation was UV resistant.

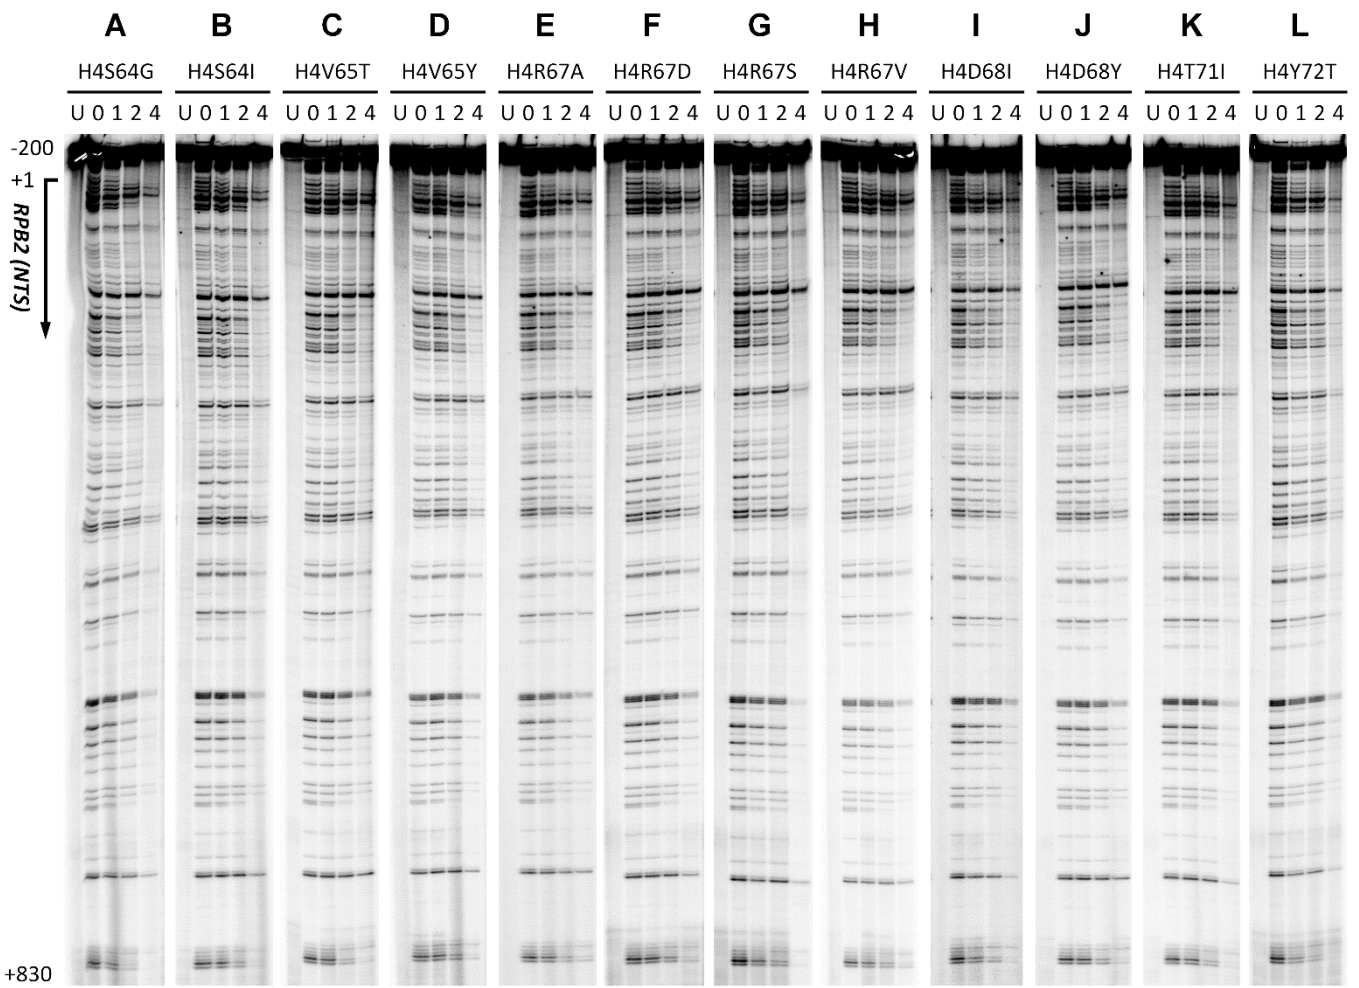

**Supplementary Fig. S1. Sequencing gels showing CPDs remaining in the nontranscribed strand of the *RPB2* genes in cells with the indicated histone H4 mutations.** The times (h) of repair incubation are indicated at the top. 'U' indicates samples from unirradiated cells. Approximate nucleotide positions relative to the transcription start site (+1) of the *RPB2* gene are indicated on the left.

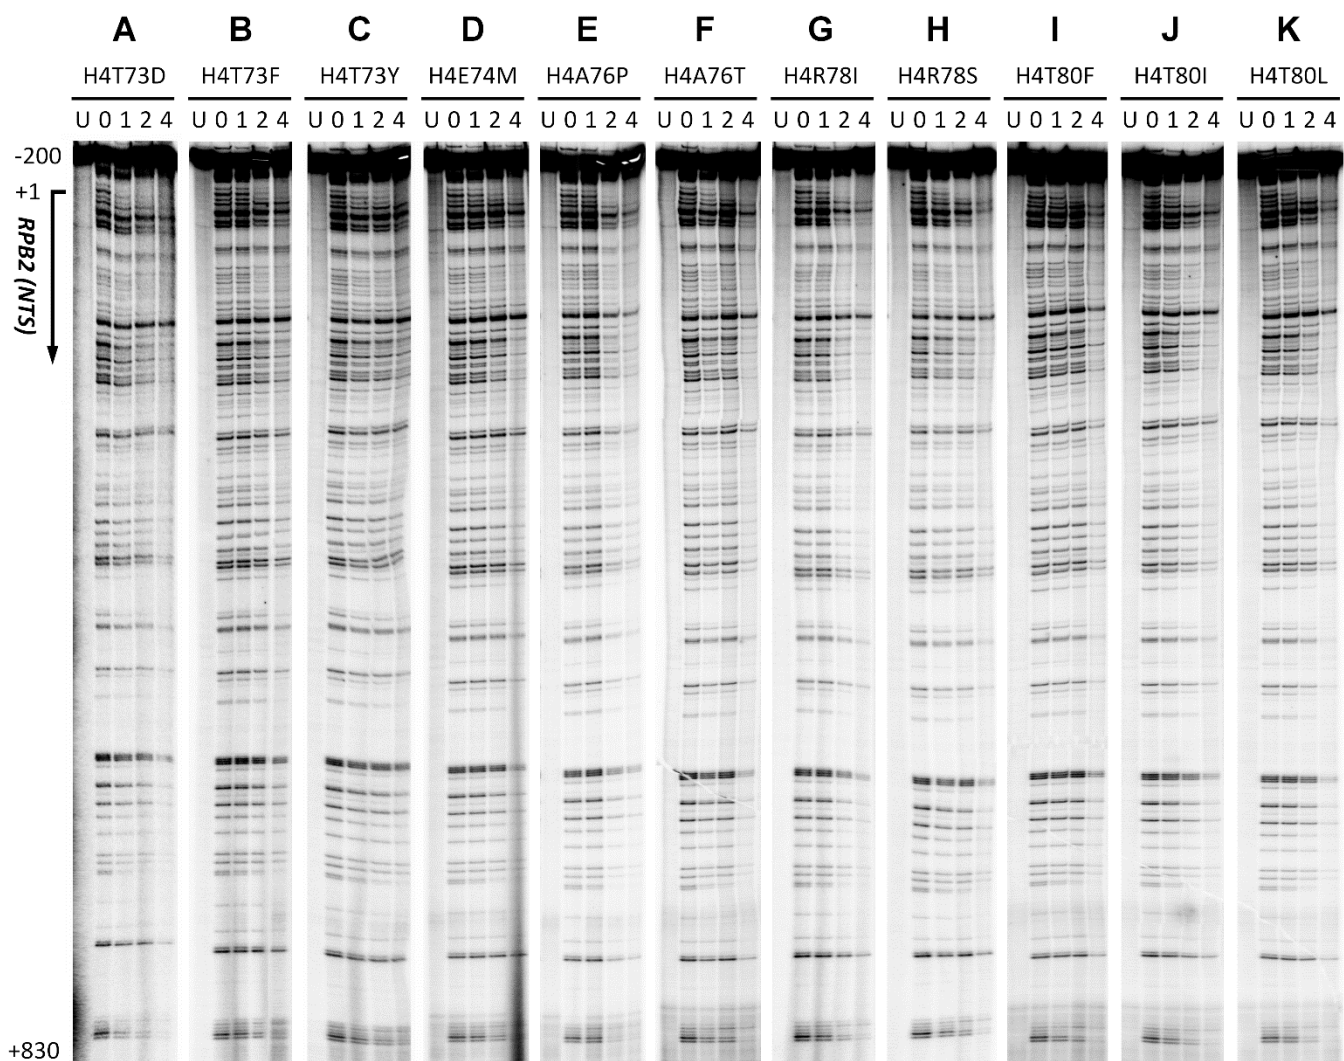

**Supplementary Fig. S2. Sequencing gels showing CPDs remaining in the nontranscribed strand of the *RPB2* genes in cells with the indicated histone H4 mutations.** The times (h) of repair incubation are indicated at the top. 'U' indicates samples from unirradiated cells. Approximate nucleotide positions relative to the transcription start site (+1) of the *RPB2* gene are indicated on the left.

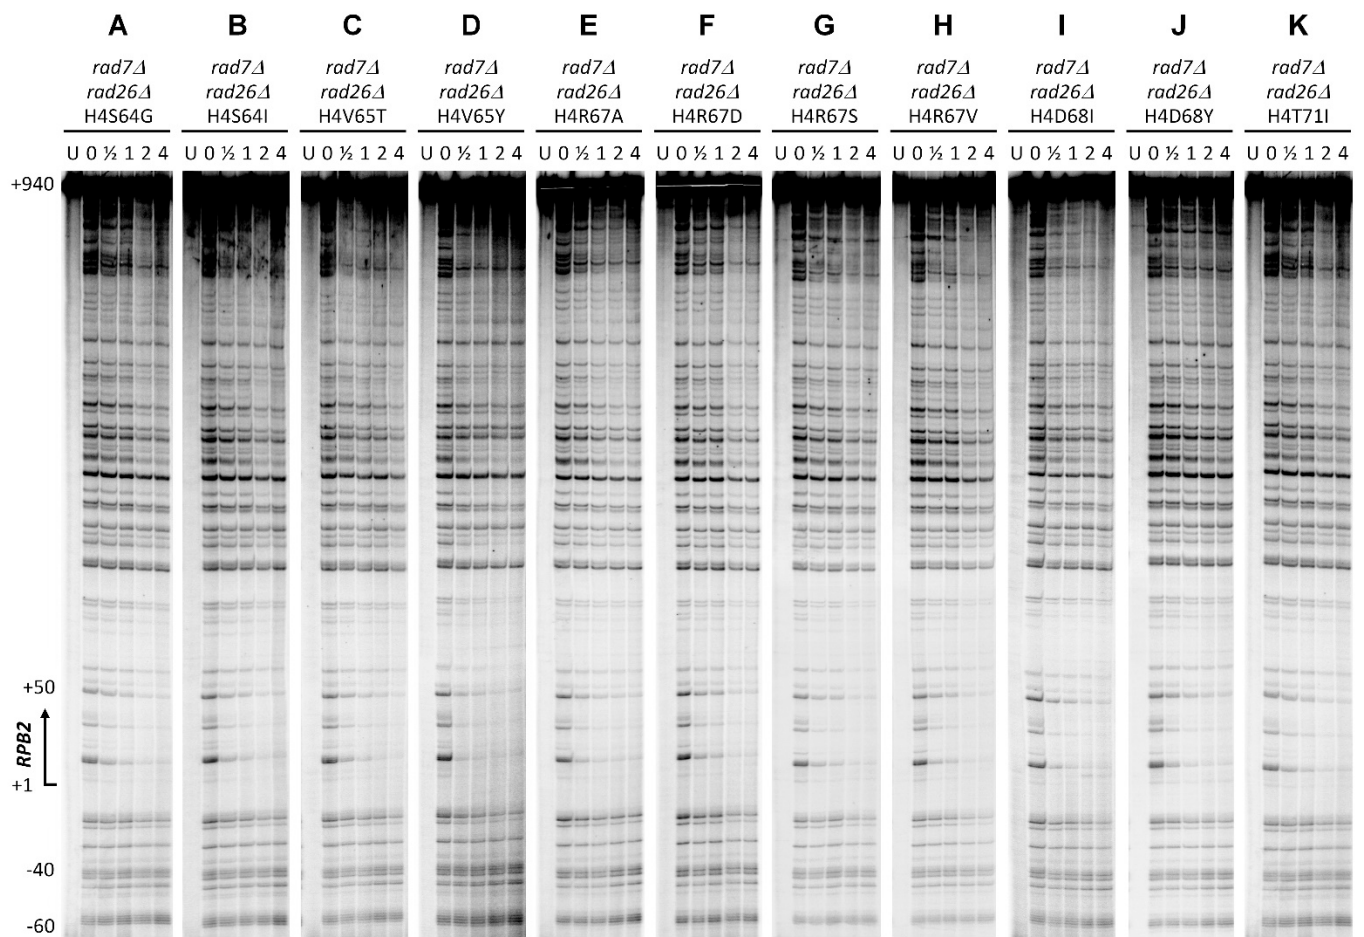

**Supplementary Fig. S3. Sequencing gels showing CPDs remaining in the transcribed strand of the *RPB2* genes in *rad7Δ rad26Δ* cells with the indicated histone H4 mutations.** The times (h) of repair incubation are indicated at the top. 'U' indicates samples from unirradiated cells. Approximate nucleotide positions relative to the transcription start site (+1) of the *RPB2* gene are indicated on the left.

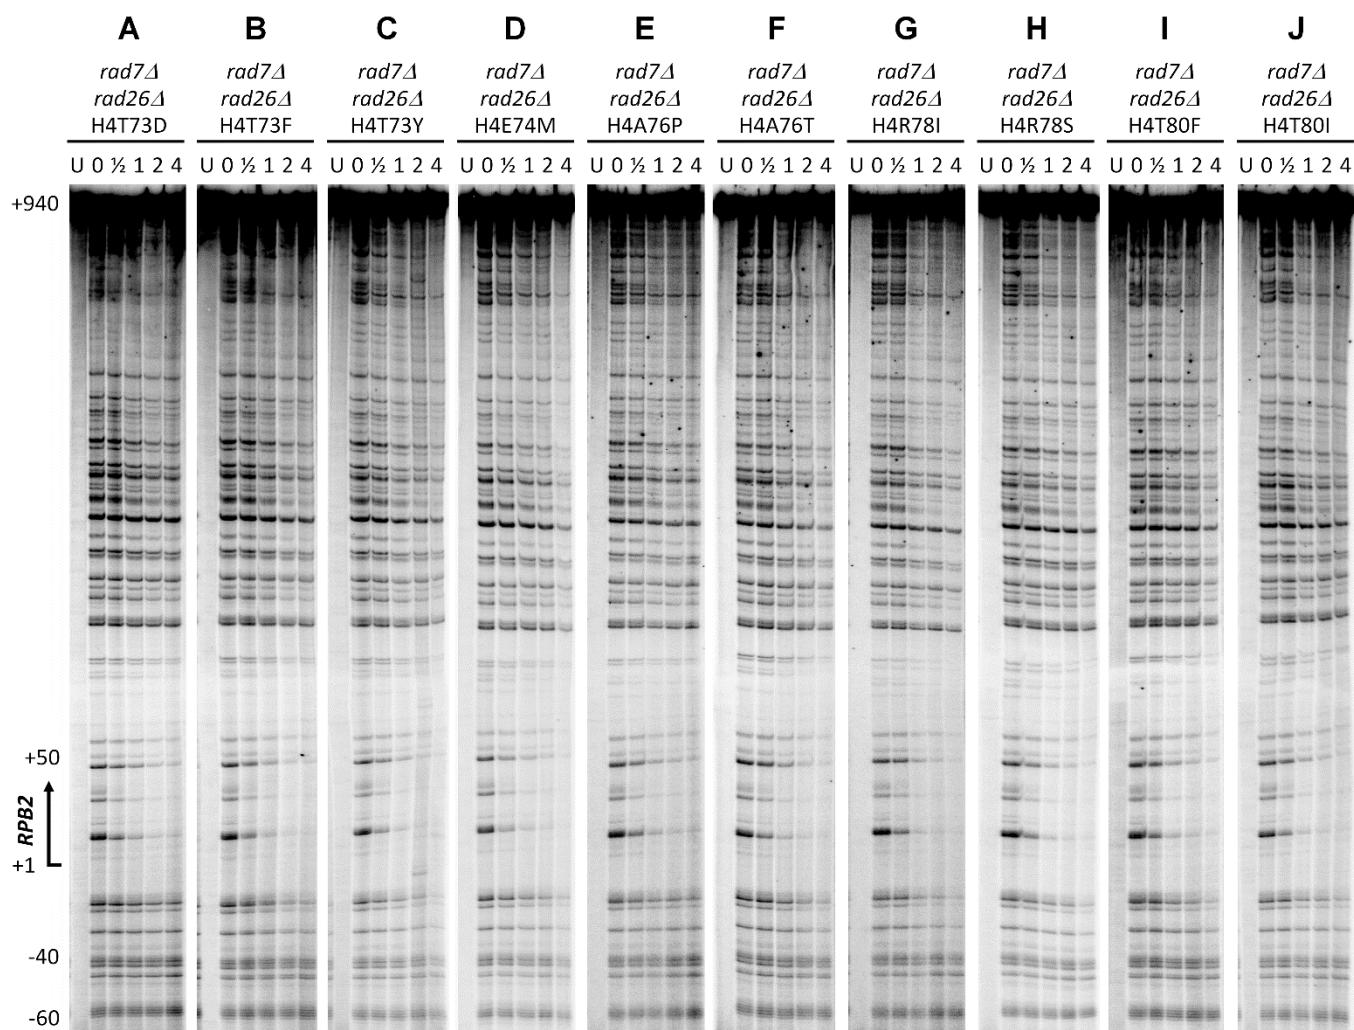

**Supplementary Fig. S4. Sequencing gels showing CPDs remaining in the transcribed strand of the *RPB2* genes in *rad7Δ rad26Δ* cells with the indicated histone H4 mutations.** The times (h) of repair incubation are indicated at the top. 'U' indicates samples from unirradiated cells. Approximate nucleotide positions relative to the transcription start site (+1) of the *RPB2* gene are indicated on the left.

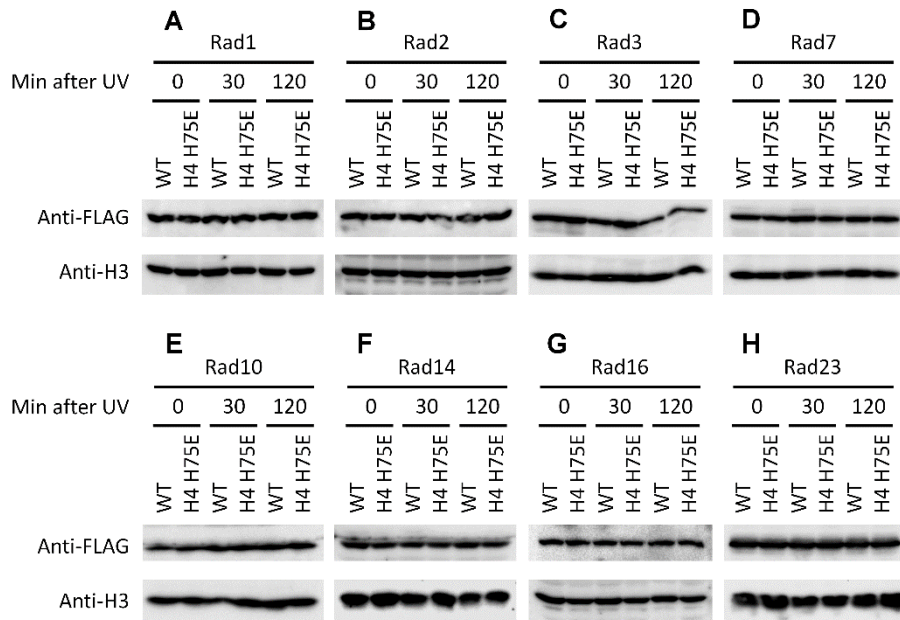

**Supplementary Fig. S5. H4H75E mutation does not significantly affect cellular levels of NER proteins.** (A-H) Western blots showing cellular levels of 3xFLAG tagged NER proteins. Total histone H3 serves as loading control.

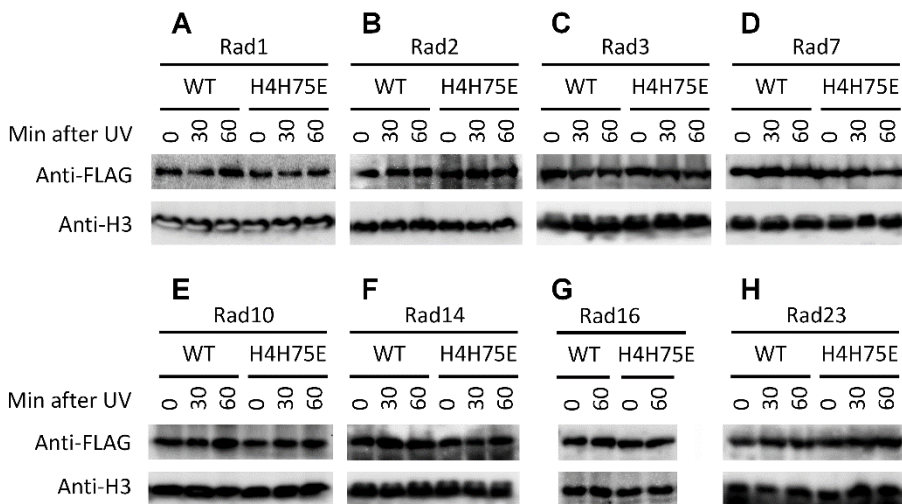

**Supplementary Fig. S6. H4H75E mutation does not dramatically affect the association of NER proteins (other than Rad4) with chromatin.** (A-H) Western blots showing the levels of chromatin-associated 3xFLAG tagged NER proteins. Histone H3 serves as loading control.
